# Supplementary material
Source: publisher figshare collection journal article supplement (https://tandf.figshare.com/articles/dataset/_/9125390)
Supplement: Supplementary file 1 [file 1]

Archive with 2 entries (2 files):
- Supplementary File 1.pdf
- Supplementary file 2.1_2.11.pdf
