# Supplementary material
Source: publisher figshare collection journal article supplement (https://tandf.figshare.com/articles/dataset/_/9125390)
Supplement: Supplementary file 1 [file 1 › Supplementary File 1.pdf]

## MEDLINE

("atrial fibrillation"[MeSH Terms] OR ("atrial"[All Fields] AND "fibrillation"[All Fields]) OR "atrial fibrillation"[All Fields]) AND ("retinaldehyde"[MeSH Terms] OR "retinaldehyde"[All Fields] OR "retinal"[All Fields] OR "retina"[MeSH Terms] OR "retina"[All Fields])

## EMBASE

'atrial fibrillation retinal' OR (atrial AND ('fibrillation'/exp OR fibrillation) AND ('retinal'/exp OR retinal))
