# Supplementary material
Source: publisher figshare collection journal article supplement (https://tandf.figshare.com/articles/dataset/_/9125390)
Supplement: Supplementary file 1 [file 1 › Supplementary file 2.1_2.11.pdf]

Supplementary file 2.1: Tool to assess risk of bias in cohort of the study by Cazillo et al. (2015)

|                                                                                                                                                                                        |                   |
|----------------------------------------------------------------------------------------------------------------------------------------------------------------------------------------|-------------------|
| 1. Was selection of exposed and non-exposed cohorts drawn from the same population?                                                                                                    | Probably<br>yes   |
| 2. Can we be confident in the assessment of exposure?                                                                                                                                  | Definitely<br>yes |
| 3. Can we be confident that the outcome of interest was not present at start of study?                                                                                                 | Probably<br>no    |
| 4. Did the study match exposed and unexposed for all variables that are associated with the outcome of interest or did the statistical analysis adjust for these prognostic variables? | Probably<br>yes   |
| 5. Can we be confident in the assessment of the presence or absence of prognostic factors?                                                                                             | Probably<br>yes   |
| 6. Can we be confident in the assessment of outcome?                                                                                                                                   | Definitely<br>yes |
| 7. Was the follow up of cohorts adequate?                                                                                                                                              | Probably<br>yes   |
| 8. Were co-interventions similar between groups?                                                                                                                                       | Probably<br>yes   |

Supplementary file 2.2: Tool to assess risk of bias in cohort of the study by Cazillo et al. (2017)

|                                                                                                                                                                                        |                   |
|----------------------------------------------------------------------------------------------------------------------------------------------------------------------------------------|-------------------|
| 1. Was selection of exposed and non-exposed cohorts drawn from the same population?                                                                                                    | Definitely<br>yes |
| 2. Can we be confident in the assessment of exposure?                                                                                                                                  | Definitely<br>yes |
| 3. Can we be confident that the outcome of interest was not present at start of study?                                                                                                 | Probably<br>no    |
| 4. Did the study match exposed and unexposed for all variables that are associated with the outcome of interest or did the statistical analysis adjust for these prognostic variables? | Probably<br>yes   |
| 5. Can we be confident in the assessment of the presence or absence of prognostic factors?                                                                                             | Probably<br>yes   |
| 6. Can we be confident in the assessment of outcome?                                                                                                                                   | Definitely<br>yes |
| 7. Was the follow up of cohorts adequate                                                                                                                                               | Definitely<br>yes |
| 8. Were co-interventions similar between groups?                                                                                                                                       | Definitely<br>yes |

Supplementary file 2.3: Tool to assess risk of bias in cohort of the study by Chapin et al.

|                                                                                                                                                                                        |                |
|----------------------------------------------------------------------------------------------------------------------------------------------------------------------------------------|----------------|
| 1. Was selection of exposed and non-exposed cohorts drawn from the same population?                                                                                                    | Definitely yes |
| 2. Can we be confident in the assessment of exposure?                                                                                                                                  | Definitely yes |
| 3. Can we be confident that the outcome of interest was not present at start of study?                                                                                                 | Probably no    |
| 4. Did the study match exposed and unexposed for all variables that are associated with the outcome of interest or did the statistical analysis adjust for these prognostic variables? | Probably no    |
| 5. Can we be confident in the assessment of the presence or absence of prognostic factors?                                                                                             | Probably yes   |
| 6. Can we be confident in the assessment of outcome?                                                                                                                                   | Definitely yes |
| 7. Was the follow up of cohorts adequate                                                                                                                                               | Probably yes   |
| 8. Were co-interventions similar between groups?                                                                                                                                       | Definitely yes |

Supplementary file 2.4: Tool to assess risk of bias in cohort of the study by French et al.

|                                                                                                                                                                                        |                |
|----------------------------------------------------------------------------------------------------------------------------------------------------------------------------------------|----------------|
| 1. Was selection of exposed and non-exposed cohorts drawn from the same population?                                                                                                    | Probably no    |
| 2. Can we be confident in the assessment of exposure?                                                                                                                                  | Definitely yes |
| 3. Can we be confident that the outcome of interest was not present at start of study?                                                                                                 | Probably no    |
| 4. Did the study match exposed and unexposed for all variables that are associated with the outcome of interest or did the statistical analysis adjust for these prognostic variables? | Probably yes   |
| 5. Can we be confident in the assessment of the presence or absence of prognostic factors?                                                                                             | Probably yes   |
| 6. Can we be confident in the assessment of outcome?                                                                                                                                   | Definitely yes |
| 7. Was the follow up of cohorts adequate                                                                                                                                               | Probably yes   |
| 8. Were co-interventions similar between groups?                                                                                                                                       | Probably yes   |

Supplementary file 2.5: Tool to assess risk of bias in cohort of the study by Hankey et al.

|                                                                                                                                                                                        |                   |
|----------------------------------------------------------------------------------------------------------------------------------------------------------------------------------------|-------------------|
| 1. Was selection of exposed and non-exposed cohorts drawn from the same population?                                                                                                    | Probably<br>yes   |
| 2. Can we be confident in the assessment of exposure?                                                                                                                                  | Definitely<br>yes |
| 3. Can we be confident that the outcome of interest was not present at start of study?                                                                                                 | Probably<br>no    |
| 4. Did the study match exposed and unexposed for all variables that are associated with the outcome of interest or did the statistical analysis adjust for these prognostic variables? | Probably<br>no    |
| 5. Can we be confident in the assessment of the presence or absence of prognostic factors?                                                                                             | Probably<br>yes   |
| 6. Can we be confident in the assessment of outcome?                                                                                                                                   | Definitely<br>yes |
| 7. Was the follow up of cohorts adequate                                                                                                                                               | Probably<br>yes   |
| 8. Were co-interventions similar between groups?                                                                                                                                       | Probably<br>yes   |

Supplementary file 2.6: Tool to assess risk of bias in case control study by Koizumi et al.

|                                                                                                                                               |                   |
|-----------------------------------------------------------------------------------------------------------------------------------------------|-------------------|
| 1. Can we be confident in the assessment of exposure?                                                                                         | Definitely<br>yes |
| 2. Can we be confident that cases had developed the outcome of interest and controls had not?                                                 | Definitely<br>yes |
| 3. Were the cases (those who were exposed and developed the outcome of interest) properly selected?                                           | Probably<br>yes   |
| 4. Were the controls (those who were exposed and did not develop the outcome of interest) properly selected?                                  | Probably<br>yes   |
| 5. Were cases and controls matched according to important prognostic variables or was statistical adjustment carried out for those variables? | Definitely<br>yes |

Supplementary file 2.7: Tool to assess risk of bias in cohort of the study by Lecumberri et al.

|                                                                                                                                                                                        |                |
|----------------------------------------------------------------------------------------------------------------------------------------------------------------------------------------|----------------|
| 1. Was selection of exposed and non-exposed cohorts drawn from the same population?                                                                                                    | Probably yes   |
| 2. Can we be confident in the assessment of exposure?                                                                                                                                  | Definitely yes |
| 3. Can we be confident that the outcome of interest was not present at start of study?                                                                                                 | Probably no    |
| 4. Did the study match exposed and unexposed for all variables that are associated with the outcome of interest or did the statistical analysis adjust for these prognostic variables? | Probably no    |
| 5. Can we be confident in the assessment of the presence or absence of prognostic factors?                                                                                             | Definitely yes |
| 6. Can we be confident in the assessment of outcome?                                                                                                                                   | Definitely yes |
| 7. Was the follow up of cohorts adequate                                                                                                                                               | Definitely yes |
| 8. Were co-interventions similar between groups?                                                                                                                                       | Definitely yes |

Supplementary file 2.8: Tool to assess risk of bias in cohort of the study by Ponto et al.

|                                                                                                                                                                                        |                |
|----------------------------------------------------------------------------------------------------------------------------------------------------------------------------------------|----------------|
| 1. Was selection of exposed and non-exposed cohorts drawn from the same population?                                                                                                    | Probably yes   |
| 2. Can we be confident in the assessment of exposure?                                                                                                                                  | Definitely yes |
| 3. Can we be confident that the outcome of interest was not present at start of study?                                                                                                 | Probably no    |
| 4. Did the study match exposed and unexposed for all variables that are associated with the outcome of interest or did the statistical analysis adjust for these prognostic variables? | Probably yes   |
| 5. Can we be confident in the assessment of the presence or absence of prognostic factors?                                                                                             | Probably yes   |
| 6. Can we be confident in the assessment of outcome?                                                                                                                                   | Definitely yes |
| 7. Was the follow up of cohorts adequate                                                                                                                                               | Probably yes   |
| 8. Were co-interventions similar between groups?                                                                                                                                       | Definitely yes |

Supplementary file 2.9: Tool to assess risk of bias in cohort of the study by Rim et al.

|                                                                                                                                                                                        |                   |
|----------------------------------------------------------------------------------------------------------------------------------------------------------------------------------------|-------------------|
| 1. Was selection of exposed and non-exposed cohorts drawn from the same population?                                                                                                    | Probably<br>no    |
| 2. Can we be confident in the assessment of exposure?                                                                                                                                  | Probably<br>yes   |
| 3. Can we be confident that the outcome of interest was not present at start of study?                                                                                                 | Probably<br>no    |
| 4. Did the study match exposed and unexposed for all variables that are associated with the outcome of interest or did the statistical analysis adjust for these prognostic variables? | Probably<br>yes   |
| 5. Can we be confident in the assessment of the presence or absence of prognostic factors?                                                                                             | Probably<br>yes   |
| 6. Can we be confident in the assessment of outcome?                                                                                                                                   | Probably<br>yes   |
| 7. Was the follow up of cohorts adequate                                                                                                                                               | Probably<br>yes   |
| 8. Were co-interventions similar between groups?                                                                                                                                       | Definitely<br>yes |

Supplementary file 2.10: Tool to assess risk of bias in cohort of the study by Rudkin et al.

|                                                                                                                                                                                        |                |
|----------------------------------------------------------------------------------------------------------------------------------------------------------------------------------------|----------------|
| 1. Was selection of exposed and non-exposed cohorts drawn from the same population?                                                                                                    | Probably yes   |
| 2. Can we be confident in the assessment of exposure?                                                                                                                                  | Definitely yes |
| 3. Can we be confident that the outcome of interest was not present at start of study?                                                                                                 | Probably no    |
| 4. Did the study match exposed and unexposed for all variables that are associated with the outcome of interest or did the statistical analysis adjust for these prognostic variables? | Probably no    |
| 5. Can we be confident in the assessment of the presence or absence of prognostic factors?                                                                                             | Probably yes   |
| 6. Can we be confident in the assessment of outcome?                                                                                                                                   | Definitely yes |
| 7. Was the follow up of cohorts adequate                                                                                                                                               | Definitely yes |
| 8. Were co-interventions similar between groups?                                                                                                                                       | Definitely yes |

Supplementary file 2.11: Tool to assess risk of bias in cohort of the study by Toft-Peterson et al.

|                                                                                                                                                                                        |                |
|----------------------------------------------------------------------------------------------------------------------------------------------------------------------------------------|----------------|
| 1. Was selection of exposed and non-exposed cohorts drawn from the same population?                                                                                                    | Probably no    |
| 2. Can we be confident in the assessment of exposure?                                                                                                                                  | Definitely yes |
| 3. Can we be confident that the outcome of interest was not present at start of study?                                                                                                 | Probably no    |
| 4. Did the study match exposed and unexposed for all variables that are associated with the outcome of interest or did the statistical analysis adjust for these prognostic variables? | Probably yes   |
| 5. Can we be confident in the assessment of the presence or absence of prognostic factors?                                                                                             | Probably yes   |
| 6. Can we be confident in the assessment of outcome?                                                                                                                                   | Definitely yes |
| 7. Was the follow up of cohorts adequate                                                                                                                                               | Definitely yes |
| 8. Were co-interventions similar between groups?                                                                                                                                       | Definitely yes |
